# Supplementary material for: Improving the visible-light photoresponse characteristics of a ZnO phototransistor via solution processable Li dopants
Source: Royal Society of Chemistry journal article supplement (doi:10.1039/d1tc02088a), 2021-01-01
Supplement: d1tc02088a1.pdf [file d1tc02088a1.pdf]

**Supplementary Information for:**

**Improving visible-light photoresponse characteristics of  
ZnO phototransistor via solution processable Li dopants**

Jun Hyung Jeong<sup>a</sup>, Sungho Park<sup>a</sup>, Byung Jun Kim<sup>a</sup>, Su Been Heo<sup>a</sup>, Tae Yeon Kim<sup>a</sup>, Jae  
Seung Shin<sup>a,b</sup>, Jong Hun Yu<sup>a</sup>, Jin Hyun Ma<sup>a</sup>, Min Gye Kim<sup>a</sup>, Seong Jun Kang<sup>a,b,\*</sup>

<sup>a</sup> Department of Advanced Materials Engineering for Information and Electronics, Kyung  
Hee University, Yongin 17101, Republic of Korea

<sup>b</sup> Integrated Education Program for Frontier Materials (BK21 Four), Kyung Hee University,  
Yongin 17104, Republic of Korea

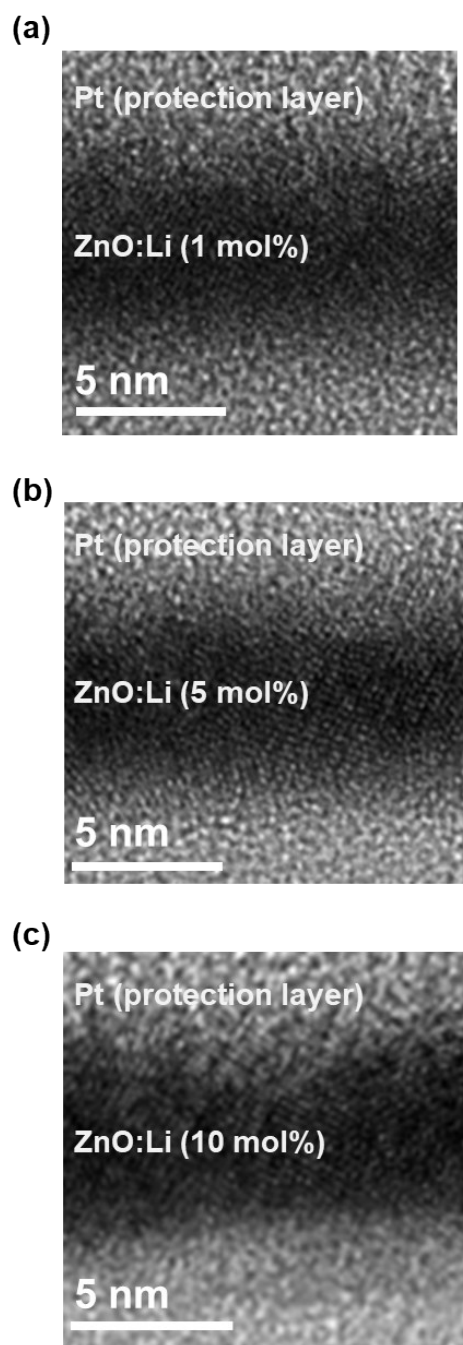

**Figure S1.** Cross-sectional high-resolution TEM images of a) ZnO:Li (1 mol%), b) ZnO:Li (5 mol%), and c) ZnO:Li (10 mol%) films.

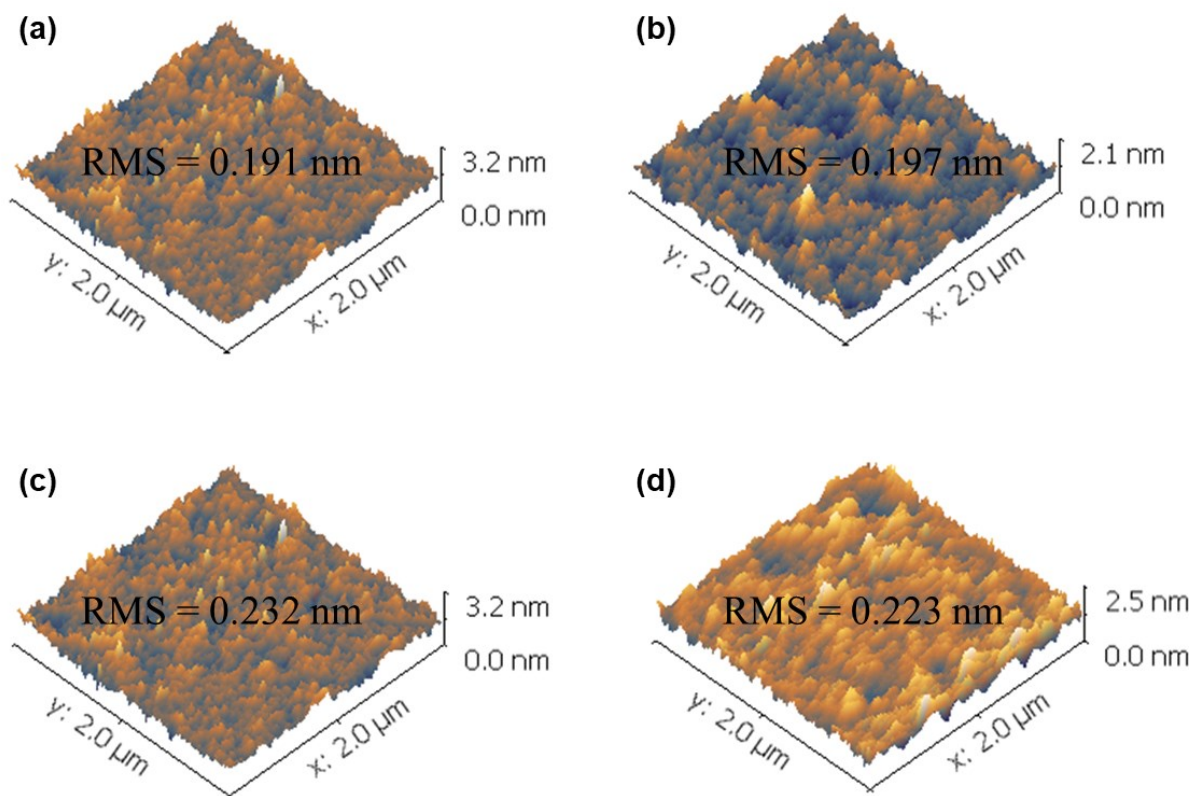

**Figure S2.** AFM images and root mean square (RMS) values of a) ZnO, b) ZnO:Li (1 mol%), c) ZnO:Li (5 mol%), and d) ZnO:Li (10 mol%).

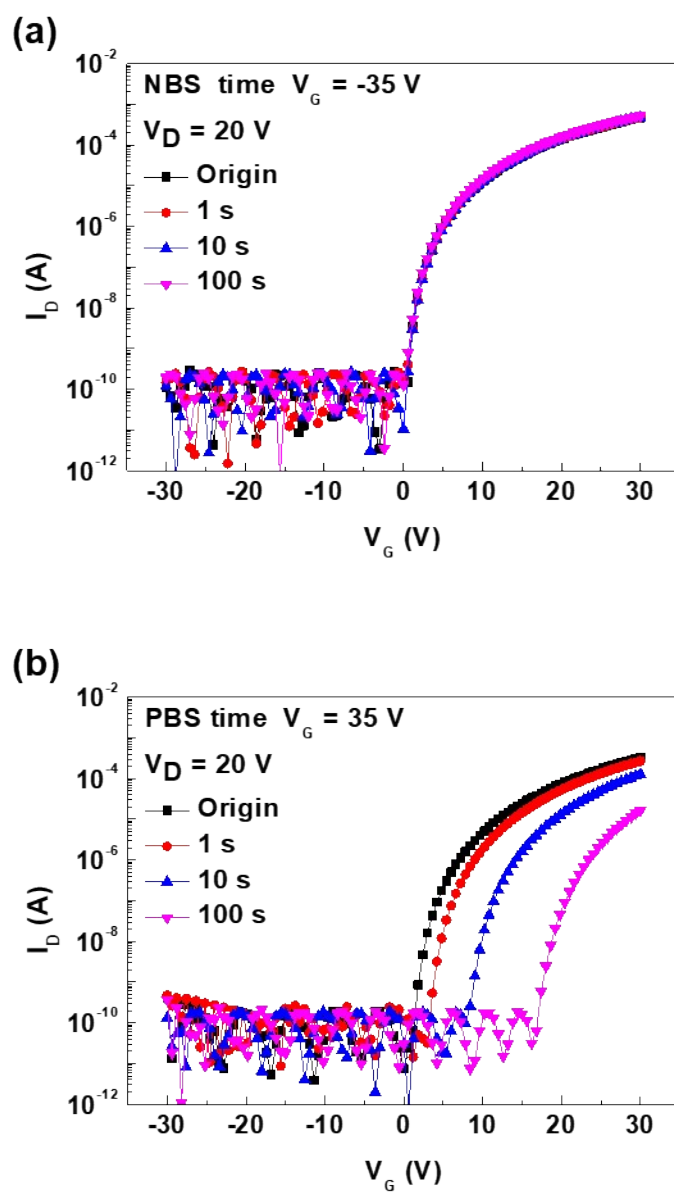

**Figure S3.** a) NBS at  $V_G = -35$  V on the ZnO:Li (5 mol%) TFT. b) PBS at  $V_G = 35$  V on the ZnO:Li (5 mol%) TFT.

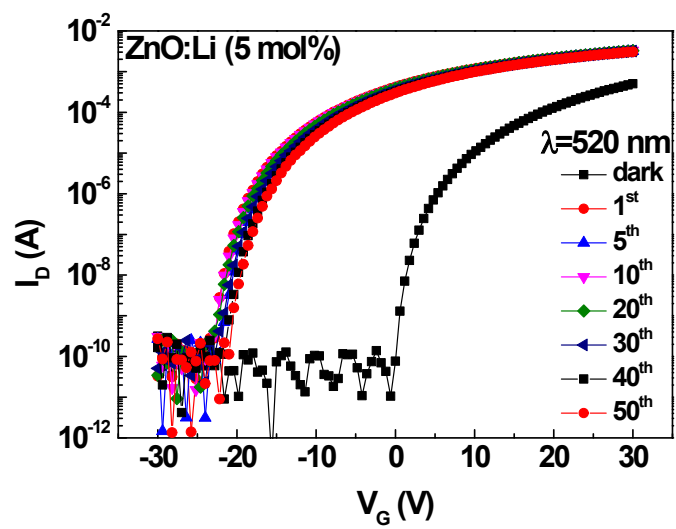

**Figure S4.** Transfer curve of ZnO:Li (5 mol%) TFT measured 50 times under 520 nm wavelength light exposure.

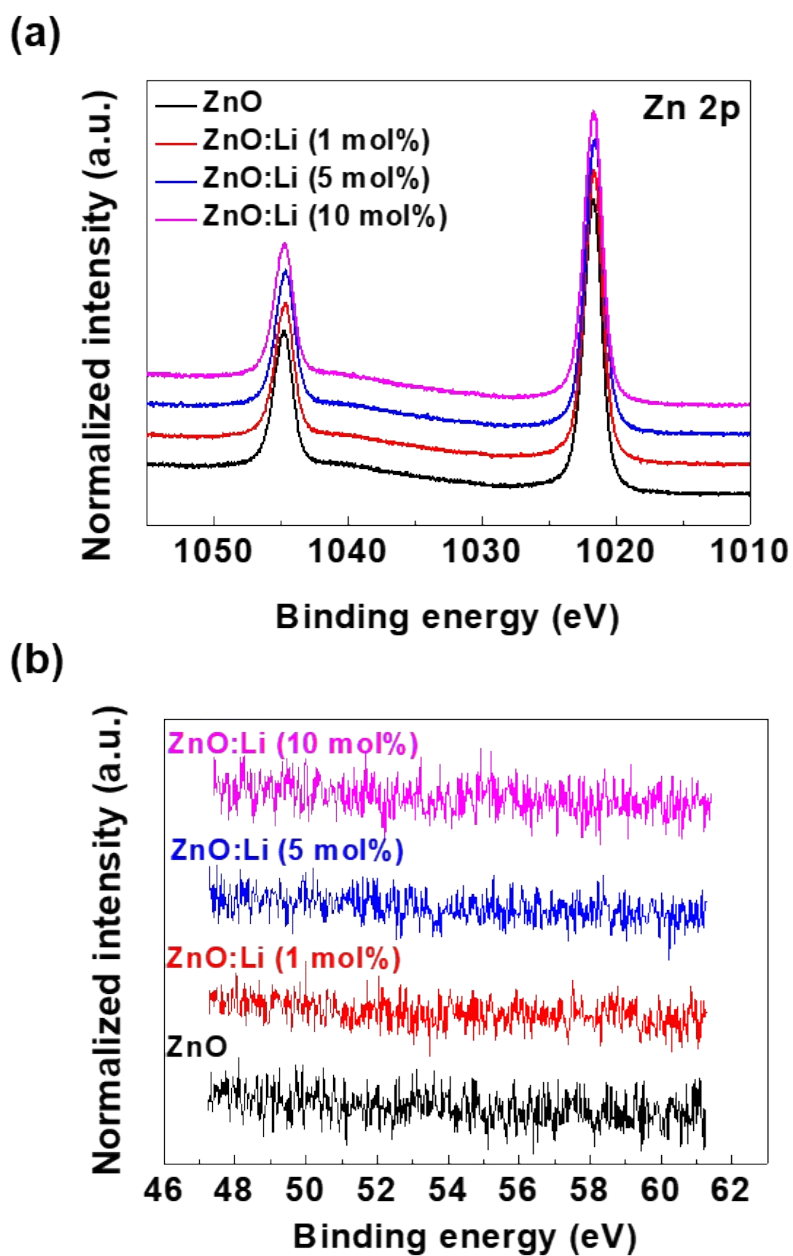

**Figure S5.** XPS spectra of a) Zn 2p and b) Li 1s of ZnO, ZnO:Li (1 mol%), ZnO:Li (5 mol%), and ZnO:Li (10 mol%) films, respectively.

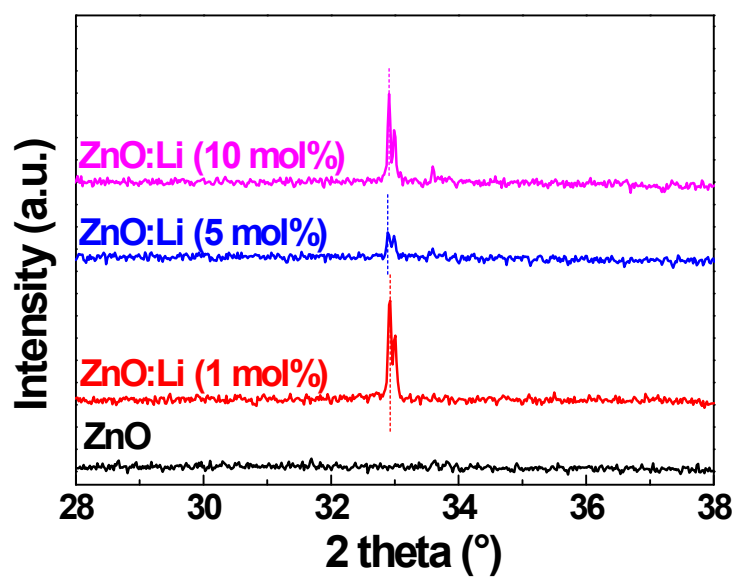

**Figure S6.** XRD spectra of ZnO, ZnO:Li (1 mol%), ZnO:Li (5 mol%), and ZnO:Li (10 mol%) films.

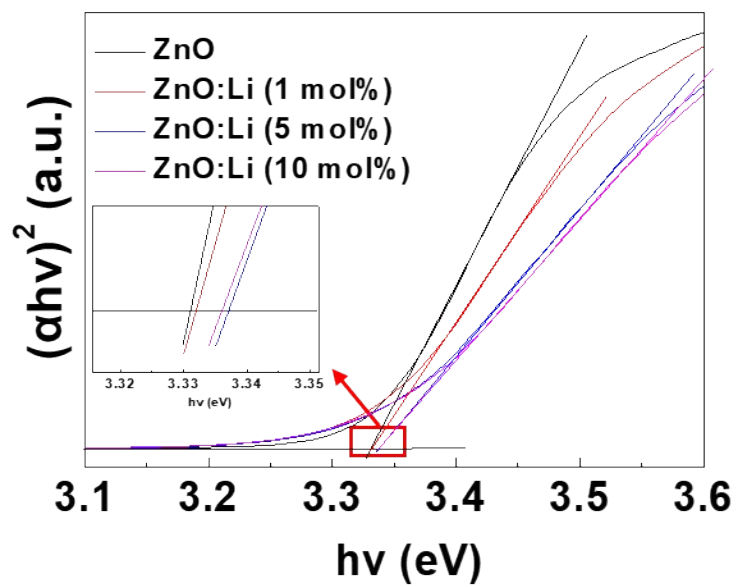

**Figure S7.** Tauc's plots of ZnO, ZnO:Li (1 mol%), ZnO:Li (5 mol%), and ZnO:Li (10 mol%) films.



|                  | 2θ<br>(°) |
|------------------|-----------|
| ZnO              | -         |
| ZnO:Li (1 mol%)  | 32.93     |
| ZnO:Li (5 mol%)  | 32.89     |
| ZnO:Li (10 mol%) | 32.91     |

**Table S1.** XRD peaks(2θ) of (100) plane of ZnO, ZnO:Li (1 mol%), ZnO:Li (5 mol%), and ZnO:Li (10 mol%) films.
